# Supplementary material
Source: PubMed Central journal article supplement (PMC7279969)
Supplement: BPH-177-3046-s001.pdf [file BPH-177-3046-s001.pdf]

Supplementary information for

**Intraocular pressure fluctuation and neurodegeneration in diabetic rat retina**

Kyoung In Jung, M.D., Ph.D., Jung Eun Woo, Chan Kee Park, M.D., Ph.D

Chan Kee Park: [ckpark@catholic.ac.kr](mailto:ckpark@catholic.ac.kr)

This PDF files includes

Supplementary figure S1 to S5

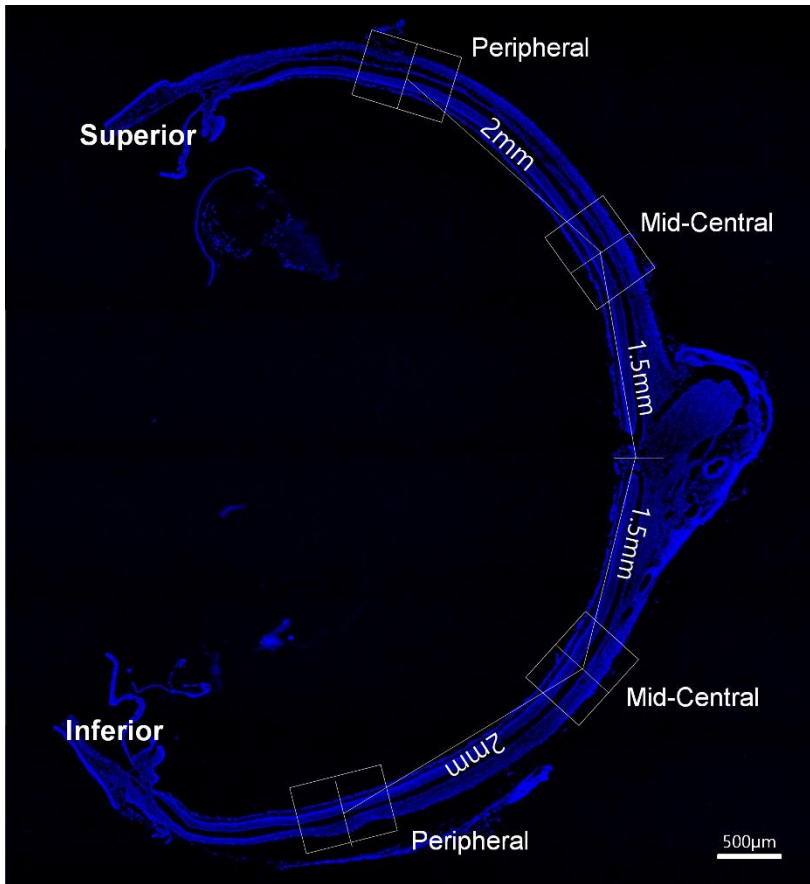

**Fig. S1.** Representative posterior eyecup image stained with DAPI for analysis. Each eyecup was divided into 2 mid central (1.5 mm from the optic nerve), 2 peripheral areas (3.5mm from the optic nerve) for image analysis.

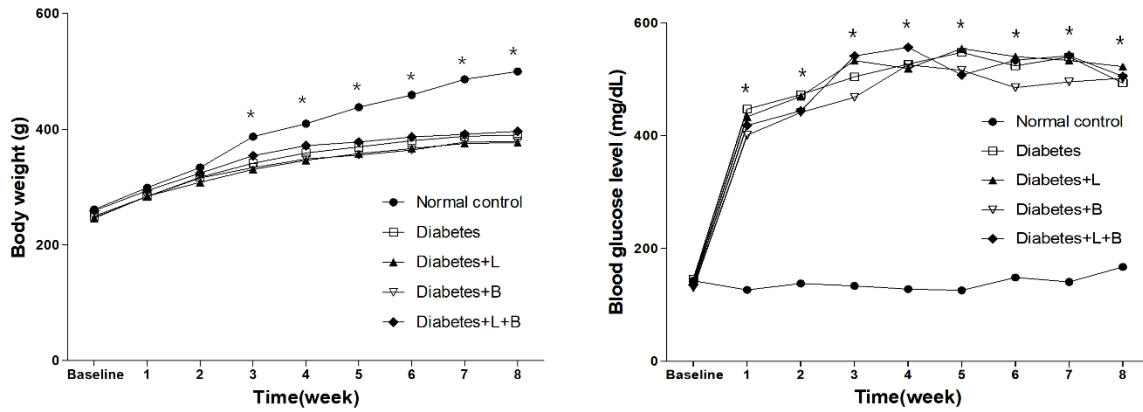

**Fig.S2** Body weight and blood glucose level in the control and diabetic rats. Body weight was lighter in the streptozotocin injected group than the normal control group ( $P < 0.001$ ) at 3 weeks after streptozotocin injection. Serum glucose was elevated in the diabetes group compared with that in the normal control group, except at the baseline, at 8 weeks after streptozotocin injection (all  $P < 0.001$ ) ( $n = 10$  per group).

\*  $P < 0.05$  by using Kruskal-Wallis and post hoc Dunn's test (one-tailed)

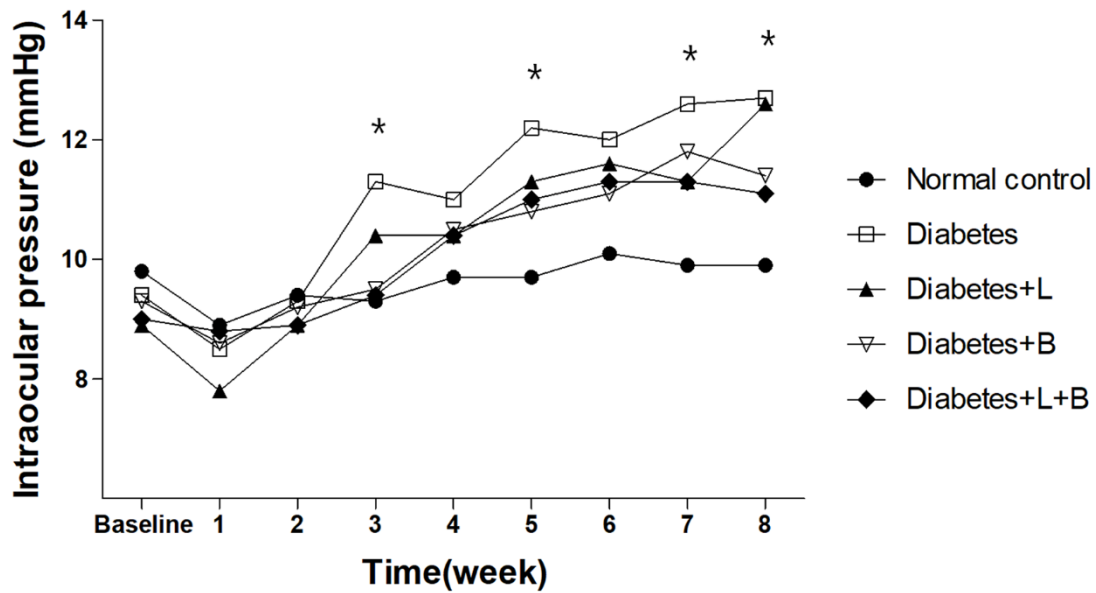

**Fig.S3** Serial change in intraocular pressure (IOP). The diabetes group (n=10) showed higher IOP than did the normal control group (n=10) at 3, 5, 7, and 8 weeks after Streptozotocin (STZ) injection. The combined treatment group (latanoprost and brinzolamide) (n=10) or the brinzolamide group (n=10) displayed lower IOP than did the diabetes group treated with saline at 3, 5, and 7 weeks after STZ injection. The combined treatment group showed lower IOP than did the diabetes group treated with saline also at 8 weeks after STZ injection.

\* P < 0.05 by using Kruskal-Wallis and post hoc Dunn's test (one-tailed)

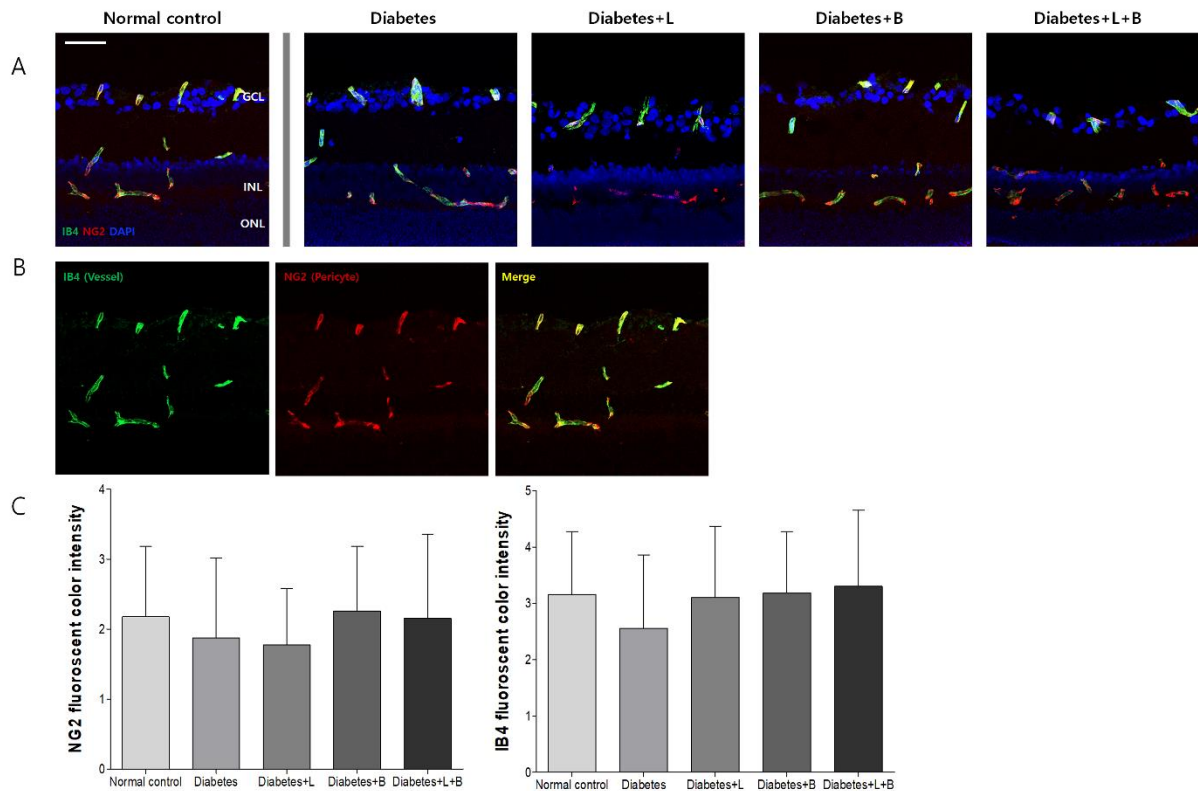

**Fig.S4** Immunofluorescence staining for pericyte and microvessel in retina. A. immunofluorescence staining of anti-NG2 antibody to measure pericyte and anti-GSL-IB4 antibody to evaluate microvessel was observed in the ganglion cell layer, inner plexiform layer, and inner nuclear layer. B. Expression of anti-NG2 antibody merged well with anti-GSL-IB4 antibody. C. There was no significant difference in the degree of anti-NG2 antibody or with anti-GSL-IB4 antibody staining among the groups ( $P=0.625$  for anti-NG2 antibody,  $P=0.514$  for anti-GSL-IB4 antibody) ( $n=10$  per group).

\*  $P < 0.05$  by using Kruskal-Wallis and post hoc Dunn's test (one-tailed)

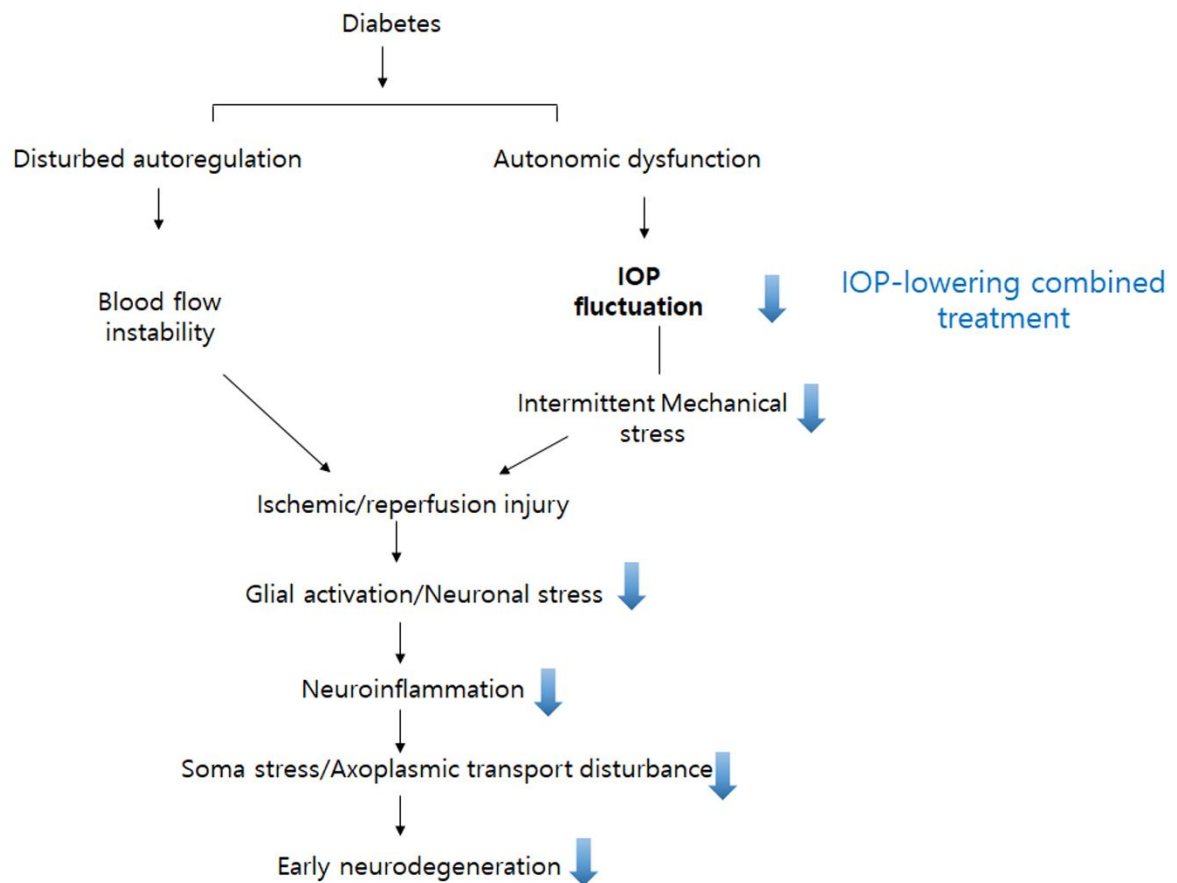

**Fig.S5** Hypothetical overview of the relationship between fluctuation of intraocular pressure and neurodegeneration in diabetic retina

IOP, intraocular pressure
